# Supplementary material
Source: PubMed Central journal article supplement (PMC2620714)

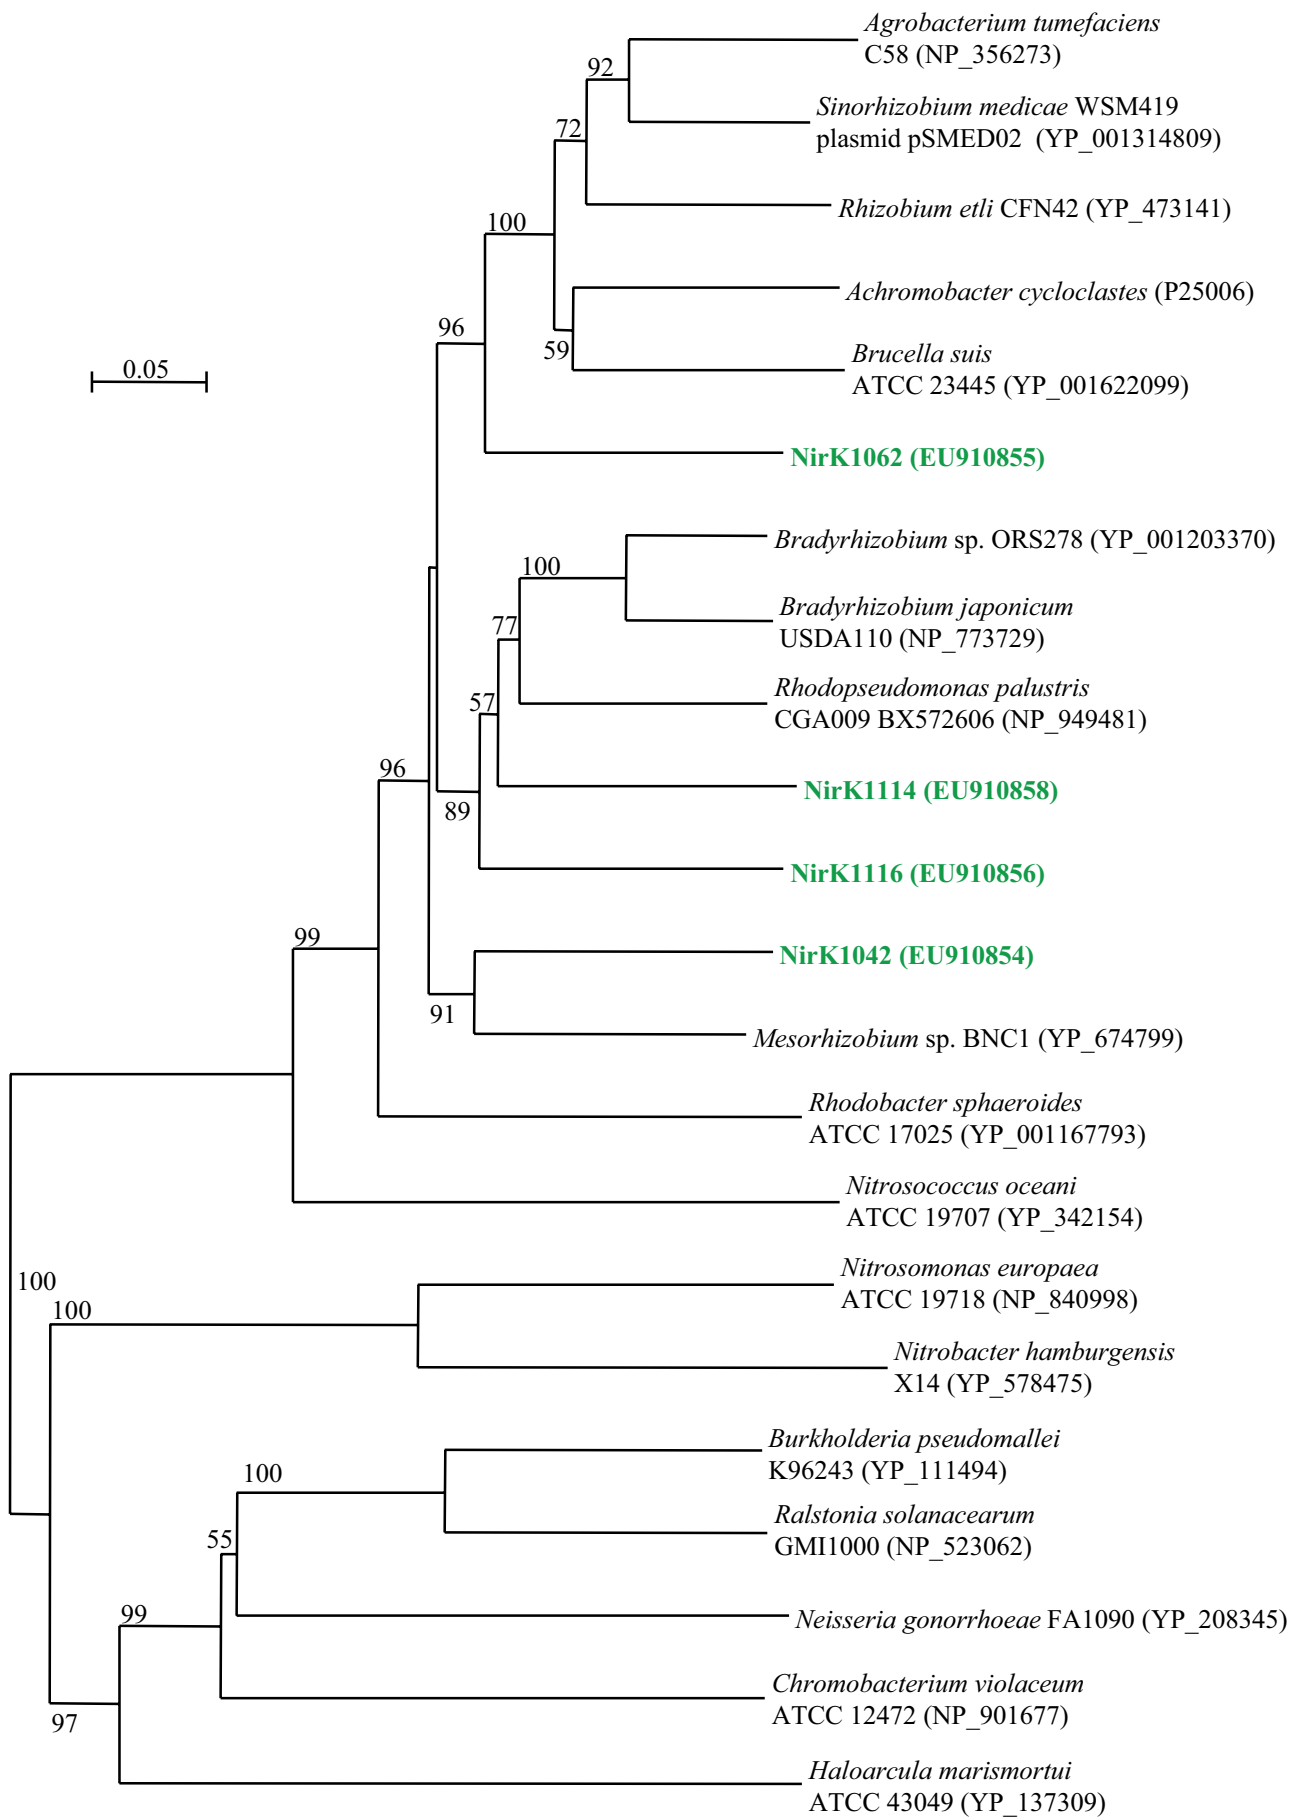

Supplement: supp_75_2_534__1.pdf [file supp_75_2_534__1.pdf]

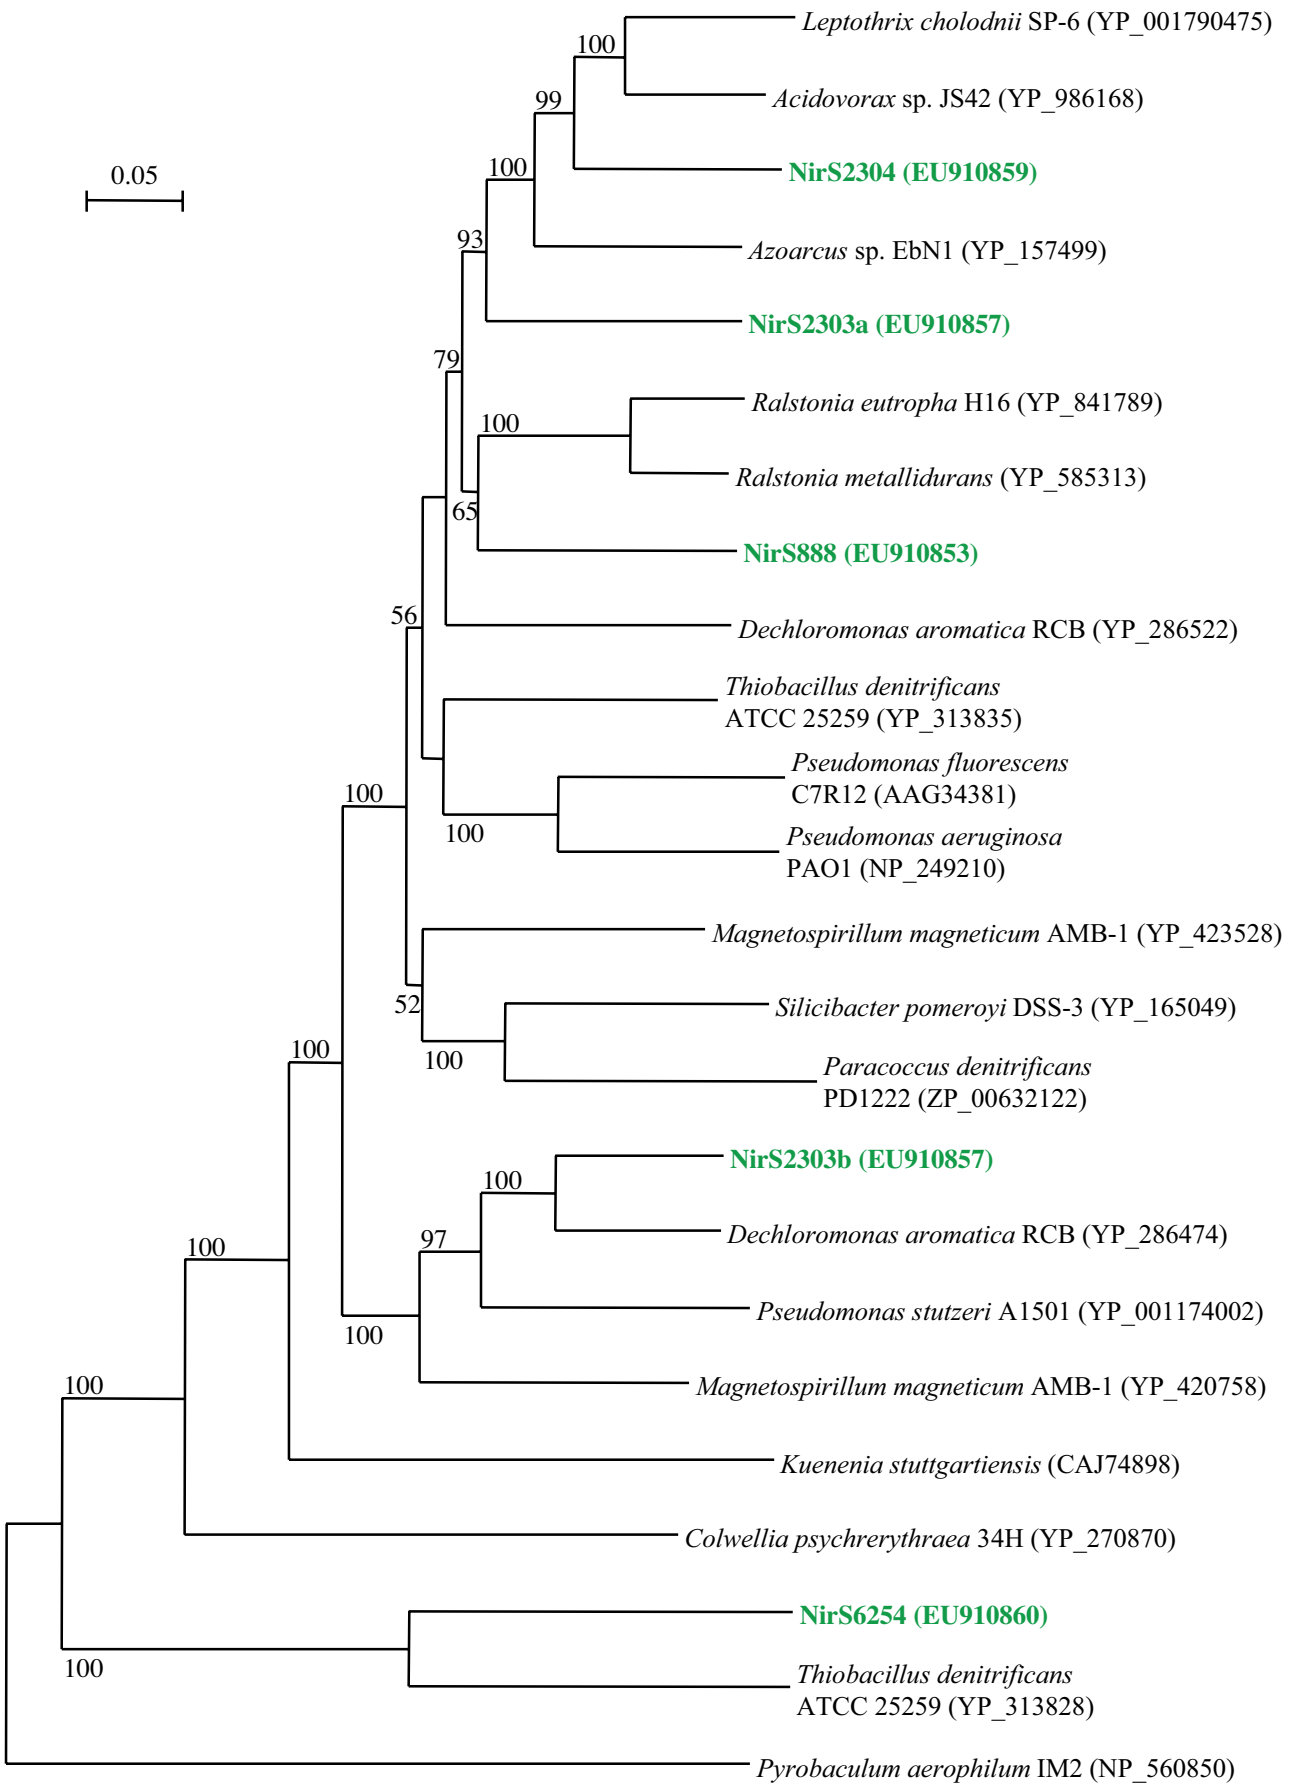

Supplement: supp_75_2_534__3.pdf [file supp_75_2_534__3.pdf]
